# Supplementary material
Source: Research Square preprint supplement (doi:10.21203/rs.3.rs-9784229/v1)
Supplement: Supplementary file 1 [file 69545150da25ba90d75403f2.docx]

**Supplementary Table S1.** Genetic parameters and likelihood ratio test (LRT) at a 5% significance level considering degrees of freedom (d.f.) of one () and two ()

| **Trait** | **Model** |  |  |  |  | **Log L** | **Convergence** | **Comparison** | **LRT** | **d.f.** | **P-value** |
| --- | --- | --- | --- | --- | --- | --- | --- | --- | --- | --- | --- |
| W70 | M1 | 0.43±0.03 | - | - | - | -14555.93 | Yes | M1 vs. M4 | 159.31 | 2 | P < 0.05 |
| M2 | 0.22±0.04 | 0.28±0.03 | - | -0.61±0.09 | -14497.44 | Yes | M2 vs. M4 | 42.35 | 1 | P < 0.05 |
| M3 | 0.16±0.03 | - | 0.14±0.01 | - | -14479.28 | Yes | M3 vs. M4 | 6.02 | 1 | P < 0.05 |
| M4 | 0.21±0.04 | 0.12±0.03 | 0.11±0.02 | -0.70±0.09 | -14476.27 | Yes | - | - | - | - |
|  |  |  |  |  |  |  |  |  |  |  |  |
| W100 | M1 | 0.45±0.03 | - | - | - | -17074.51 | Yes | M1 vs. M4 | 79.22 | 2 | P < 0.05 |
| M2 | 0.26±0.04 | 0.21±0.04 | - | -0.48±0.11 | -17044.20 | Yes | M2 vs. M4 | 18.60 | 1 | P < 0.05 |
| M3 | 0.21±0.03 | - | 0.11±0.01 | - | -17037.90 | Yes | M3 vs. M4 | 6.00 | 1 | P < 0.05 |
| M4 | 0.26±0.04 | 0.11±0.03 | 0.09±0.02 | -0.61±0.11 | -17034.90 | Yes | - | - | - | - |
|  |  |  |  |  |  |  |  |  |  |  |  |
| W155 | M1 | 0.38± 0.03 | - | - | - | -21342.50 | Yes | M1 vs. M4 | 64.60 | 2 | P < 0.05 |
| M2 | 0.28±0.04 | 0.11±0.02 | - | -0.28±0.13 | -21322.60 | Yes | M2 vs. M4 | 24.80 | 1 | P < 0.05 |
| M3 | 0.23±0.03 | - | 0.09±0.01 | - | -21312.30 | Yes | M3 vs. M4 | 4.20 | 1 | P < 0.05 |
| M4 | 0.27±0.04 | 0.05±0.02 | 0.08±0.01 | -0.50±0.13 | -21310.20 | Yes | - | - | - | - |
|  |  |  |  |  |  |  |  |  |  |  |  |
| ADG1 | M1 | 0.29±0.03 | - | - |  | 11924.21 | Yes | - | - | - | - |
| M2 | 0.00±0.00 | 0.92±0.02 | - | -0.12±0.29 | 11934.26 | No | - | - | - | - |
| M3 | 0.17±0.03 | - | 0.09±0.01 |  | 11944.23 | No | - | - | - | - |
| M4 | 0.01±0.01 | 0.80±0.20 | 0.03±0.17 | 0.58±0.50 | 11921.26 | No | - | - | - | - |
|  |  |  |  |  |  |  |  |  |  |  |  |
| ADG2 | M1 | 0.36±0.03 | - | - | - | 13614.36 | Yes | - | - | - | - |
| M2 | 0.31±0.04 | 0.15±0.03 | - | -0.38±0.12 | 13616.82 | No | - | - | - | - |
| M3 | 0.24±0.04 | - | 0.13±0.02 | - | 13603.28 | No | - | - | - | - |
| M4 | 0.28±0.05 | 0.16±0.05 | 0.12±0.03 | -0.52±0.13 | 13569.23 | No | - | - | - | - |
|  |  |  |  |  |  |  |  |  |  |  |  |
| ADG3 | M1 | 0.38±0.04 | - | - |  | 9492.89 | Yes | - | - | - | - |
| M2 | 0.30±0.05 | 0.07±0.02 | - | -0.22±0.17 | 9496.81 | No | - | - | - | - |
| M3 | 0.23±0.04 | - | 0.08±0.02 |  | 9509.54 | No | - | - | - | - |
| M4 | 0.28±0.04 | 0.09±0.03 | 0.09±0.02 | -0.52±0.00 | 9491.74 | No | - | - | - | - |
|  |  |  |  |  |  |  |  |  |  |  |  |
| BF | M1 | 0.58±0.04 | - | - |  | -7151.63 | Yes | M1 vs. M4 | 4.21 | 2 | P > 0.05 |
| M2 | 0.53±0.06 | 0.05±0.02 | - | -0.18±0.17 | -7149.54 | Yes | M2 vs. M4 | 0.03 | 1 | P > 0.05 |
| M3 | 0.55±0.05 | - | 0.02±0.02 |  | -7150.83 | Yes | M3 vs. M4 | 2.60 | 1 | P > 0.05 |
| M4 | 0.53±0.06 | 0.05±0.03 | 0.00±0.02 | -0.19±0.18 | -7149.53 | Yes | - | - | - | - |
|  |  |  |  |  |  |  |  |  |  |  |  |
| LD | M1 | 0.44±0.04 | - | - |  | -10959.55 | Yes | M1 vs. M4 | 5.38 | 2 | P > 0.05 |
| M2 | 0.38±0.05 | 0.05±0.02 | - | -0.16±0.20 | -10957.27 | Yes | M2 vs. M4 | 0.81 | 1 | P > 0.05 |
| M3 | 0.38±0.05 | - | 0.03±0.02 |  | -10957.51 | Yes | M3 vs. M4 | 1.30 | 1 | P > 0.05 |
| M4 | 0.38±0.05 | 0.03±0.02 | 0.02±0.02 | -0.24±0.22 | -10956.86 | Yes | - | - | - | - |
|  |  |  |  |  |  |  |  |  |  |  |  |
| IMF | M1 | 0.37±0.04 | - | - |  | 774.34 | Yes | M1 vs. M4 | -0.22 | 2 | P > 0.05 |
| M2 | 0.31±0.05 | 0.03±0.02 | - | -0.06±0.27 | 775.80 | Yes | M2 vs. M4 | -3.16 | 1 | P > 0.05 |
| M3 | 0.37±0.04 | - | 0.00±0.01 |  | 774.28 | Yes | M3 vs. M4 | -0.11 | 1 | P > 0.05 |
| M4 | 0.31±0.05 | 0.02±0.02 | 0.00±0.02 | -0.07±0.28 | 774.23 | Yes | - | - | - | - |

W70, W100, and W155 = body weights at 70,100, and 155 days of age; ADG1 = average daily gain from 70 to 100 days of age; ADG2 = average daily gain from 70 to 155 days of age; ADG3 = average daily gain from 100 to 155 days of age; BF = backfat thickness; LD = loin depth; IMF = intramuscular fat percentage; = direct heritability; = maternal heritability; = proportion of common litter effect in the total variance; Log L = likelihood logarithm; M1 = direct additive genetic random effects; M2 = direct additive genetic random effects + maternal additive genetic random effects; M3 = direct additive genetic random effects + maternal permanent environmental random effects; M4 = direct additive genetic random effects + maternal additive genetic random effects + maternal permanent environmental random effects.
